# Supplementary material
Source: PubMed Central journal article supplement (PMC3190881)

Suppl. Fig S1. U2OS cells transfected with empty vector (mock), Flag-B55 $\alpha$  or Flag-B56 $\gamma$  were synchronized with nocodazole for 16 hours. Where indicated, okadaic acid (OA) was added for 1h at 200 nM before collecting the cells. Lysates were subjected to Western-blot analysis with the indicated antibodies.

Suppl. Fig S2. In vitro dephosphorylation assay of FoxM1 with suboptimal amounts of PP2A A/C alone or in combination with GST-B55 $\alpha$ . Where indicated OA was added at 100 nM. Phosphorylation of FoxM1 was detected by Western-blot with a phosphothreonine-proline antibody. Quantification of the level of phosphorylation was performed with Image J. The figure shows 3 independent experiments and the graph shows the average of those replicates. Error bars represent standard deviation.

Suppl. Figure S1

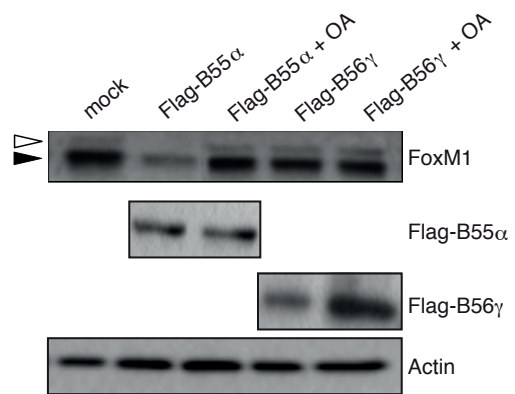

Suppl. Figure S2

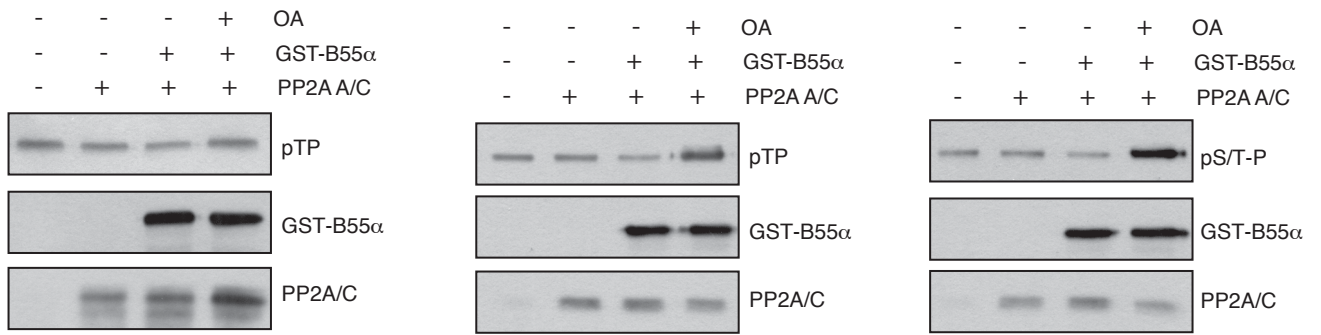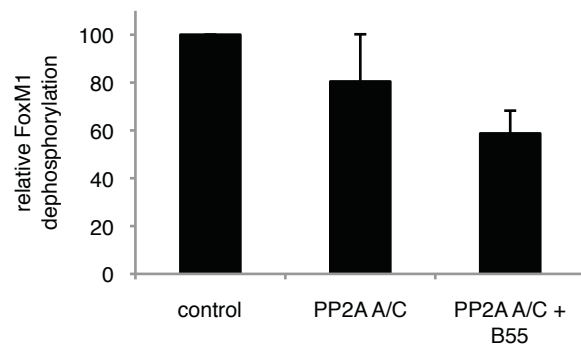

Supplement: supp_M111.253724_jbc.M111.253724-1.pdf [file supp_M111.253724_jbc.M111.253724-1.pdf]
