# Supplementary material
Source: PubMed Central journal article supplement (PMC3190881)
Supplement: supp_M111.253724_jbc.M111.253724-2.pdf [file supp_M111.253724_jbc.M111.253724-2.pdf]

Table 1. List of identified and quantified FOXM1 peptides

| Sequence                        | Phosphosites         | Ratio | Score | Modifications                         | PTM score | PTM info                                                                                                                                                                                                                                     |
|---------------------------------|----------------------|-------|-------|---------------------------------------|-----------|----------------------------------------------------------------------------------------------------------------------------------------------------------------------------------------------------------------------------------------------|
| TPIKETLPISSIPSK                 | S609 or S610 or T611 | 0.23  | 26    | 1Phospho_ST 1Dimethyl_N 2Dimeth_K     | 44.84     | 20.59 TpPIKETLPISSIPSK b1y15 .21.64 TPIKETLPISSIPSK b6y10 .44.84 TPIKETLPISSIPSK b10y6 .44.84 TPIKETLPISSIPSK b11y5 .44.84 TPIKETLPISSIPSK b12y4 .35.34 TPIKETLPISSIPSK b14y2 .                                                              |
| SPAQQESNQAEASK                  | S35                  | 0.24  | 25    | 1Phospho_ST 1Dimeth_D2_N 1Dimeth_D2_K | 7.45      | 7.45 SpPAQQESNQAEASK b1y14 .0.00 SPAQQESpNQAEASK b7y8 .0.00 SPAQQESNQAEASK b13y2 .                                                                                                                                                           |
| SPAQQESNQAEASK                  | S35                  | 0.25  | 38    | 1Phospho_ST 1Dimethyl_N 1Dimeth_K     | 31.19     | 31.19 SpPAQQESNQAEASK b1y14 .6.79 SPAQQESNQAEASK b7y8 .0.00 SPAQQESNQAEASK b13y2 .                                                                                                                                                           |
| RSPAQQESNQAEASK                 | S35                  | 0.30  | 56    | 1Phospho_ST 1Dimeth_D2_N 1Dimeth_D2_K | 92.11     | 92.11 RSPAQQESNQAEASK b2y14 .36.85 RSPAQQESNQAEASK b6y8 .0.00 RSPAQQESNQAEASK b14y2 .                                                                                                                                                        |
| RSPAQQESNQAEASK                 | S35                  | 0.31  | 52    | 1Phospho_ST 1Dimethyl_N 1Dimeth_K     | 59.35     | 59.35 RSPAQQESNQAEASK b2y14 .39.82 RSPAQQESNQAEASK b8y8 .4.38 RSPAQQESNQAEASK b14y2 .                                                                                                                                                        |
| RSPAQQESNQAEASK                 | S35                  | 0.33  | 35    | 1Phospho_ST 1Dimethyl_N 1Dimeth_K     | 20.59     | 20.59 RSPAQQESNQAEASK b2y14 .4.47 RSPAQQESpNQAEASK b8y8 .4.57 RSPAQQESNQAEASK b14y2 .                                                                                                                                                        |
| YLTDQVFK                        | -                    | 0.34  | 37    | 1Dimeth_D2_N 1Dimeth_D2_K             | -         | -                                                                                                                                                                                                                                            |
| RPNPELR                         | -                    | 0.36  | 33    | 1Dimethyl_N                           | -         | -                                                                                                                                                                                                                                            |
| EESHSHWEDSSQSPTRPK              | S506 and S508        | 0.43  | 44    | 2Phospho_ST 1Dimethyl_N 1Dimeth_K     | 53.05     | 26.91 EESpSHWEDSSQSPTRPK b3y17 b4y16 .20.10 EESHSHWEDSSQSPTRPK b3y17 b6y14 .20.10 EESHSHWEDSSQSPTRPK b4y16 b6y14 .20.10 EESHSHWEDSSQSPTRPK b4y16 b10y10 .20.10 EESHSHWEDSSQSPTRPK b4y16 b10y10 .20.10 EESHSHWEDSSQSPTRPK b6y14 b10y10 .20.10 |
| SKQCEMEK                        | -                    | 0.48  | 55    | 1Dimeth_D2_N 2Dimeth_D2_K             | -         | -                                                                                                                                                                                                                                            |
| SPAQQESNQAEASK                  | -                    | 0.53  | 127   | 1Dimeth_D2_N 1Dimeth_D2_K             | -         | -                                                                                                                                                                                                                                            |
| RSPAQQESNQAEASK                 | -                    | 0.53  | 84    | 1Dimeth_D2_N 1Dimeth_D2_K             | -         | -                                                                                                                                                                                                                                            |
| RSPAQQESNQAEASK                 | -                    | 0.54  | 79    | 1Dimeth_D2_N 1Dimeth_D2_K             | -         | -                                                                                                                                                                                                                                            |
| VSFWTHPSANR                     | -                    | 0.56  | 46    | 1Dimeth_D2_N                          | -         | -                                                                                                                                                                                                                                            |
| ETLPISSIPSK                     | -                    | 0.56  | 69    | 1Dimeth_D2_N 1Dimeth_D2_K             | -         | -                                                                                                                                                                                                                                            |
| KMSSDGLGSR                      | -                    | 0.57  | 40    | 1Dimethyl_N 1Dimeth_K                 | -         | -                                                                                                                                                                                                                                            |
| KMSSDGLGSR                      | -                    | 0.61  | 53    | 1Dimeth_D2_N 1Dimeth_D2_K             | -         | -                                                                                                                                                                                                                                            |
| MSSDGLGSR                       | -                    | 0.61  | 70    | 1Dimethyl_N                           | -         | -                                                                                                                                                                                                                                            |
| SPAQQESNQAEASK                  | -                    | 0.61  | 34    | 1Dimethyl_N 1Dimeth_K                 | -         | -                                                                                                                                                                                                                                            |
| TELPDGLR                        | -                    | 0.69  | 52    | 1Dimethyl_N                           | -         | -                                                                                                                                                                                                                                            |
| SYSGRLSPTR                      | S522                 | 0.70  | 28    | 1Phospho_ST 1Dimethyl_N               | 86.27     | 13.43 SpYSGRLSPTR b1y10 .49.68 SYSpGLRSPTR b3y8 .86.27 SYSGRLSPTR b7y4 .61.05 SYSGRLSPTR b6y2 .                                                                                                                                              |
| LPLPVQNPSETSEEEKRSPAQQESNQAEASK | S35                  | 0.73  | 65    | 1Phospho_ST 1Dimethyl_N 2Dimeth_K     | 37.14     | 23.06 LPLPVQNPSETSEEEKRSPAQQESNQAEASK b10y24 .29.75 LPLPVQNPSETSEEEKRSPAQQESNQAEASK b12y22 .29.75 LPLPVQNPSETSEEEKRSPAQQESNQAEASK b13y21 .37.14 LPLPVQNPSETSEEEKRSPAQQESNQAEASK b20y14 .22.59 LPLPVQNPSETSEEEKRSPAQQESNQAEASK b26y4          |
| LPLPVQNPSETSEEEKRSPAQQESNQAEASK | S25 or T27 or S28    | 0.74  | 49    | 1Phospho_ST 1Dimethyl_N 2Dimeth_K     | 41.21     | 41.21 LPLPVQNPSETSEEEKRSPAQQESNQAEASK b10y24 .41.21 LPLPVQNPSETSEEEKRSPAQQESNQAEASK b12y22 .41.21 LPLPVQNPSETSEEEKRSPAQQESNQAEASK b13y21 .33.77 LPLPVQNPSETSEEEKRSPAQQESNQAEASK b20y14 .26.96 LPLPVQNPSETSEEEKRSPAQQESNQAEASK b26y4          |
| LPLPVQNPSETSEEEKR               | -                    | 0.75  | 78    | 1Dimethyl_N 1Dimeth_K                 | -         | -                                                                                                                                                                                                                                            |
| EESHSHWEDSSQSPTRPK              | S498 or S499         | 0.77  | 45    | 1Phospho_ST 1Dimethyl_N 1Dimeth_K     | 38.65     | 38.65 EESpSHWEDSSQSPTRPK b3y17 .38.65 EESHSHWEDSSQSPTRPK b4y16 .31.00 EESHSHWEDSSQSPTRPK b6y14 .31.00 EESHSHWEDSSQSPTRPK b11y9 .31.00 EESHSHWEDSSQSPTRPK b13y7 .23.55 EESHSHWEDSSQSPTRPK b15y3 .                                             |
| LPLPVQNPSETSEEEKRSPAQQESNQAEASK | S35                  | 0.77  | 31    | 1Phospho_ST 1Dimethyl_N 2Dimeth_K     | 31.98     | 19.67 LPLPVQNPSETSEEEKRSPAQQESNQAEASK b10y24 .25.48 LPLPVQNPSETSEEEKRSPAQQESNQAEASK b12y22 .25.48 LPLPVQNPSETSEEEKRSPAQQESNQAEASK b13y21 .31.98 LPLPVQNPSETSEEEKRSPAQQESNQAEASK b20y14 .19.67 LPLPVQNPSETSEEEKRSPAQQESNQAEASK b26y4          |
| LPLPVQNPSETSEEEKR               | -                    | 0.80  | 85    | 1Dimeth_D2_N 1Dimeth_D2_K             | -         | -                                                                                                                                                                                                                                            |
| HIAPGWK                         | -                    | 0.80  | 27    | 1Dimethyl_N 2Dimeth_K                 | -         | -                                                                                                                                                                                                                                            |
| TPESWR                          | -                    | 0.82  | 30    | 1Dimeth_D2_N                          | -         | -                                                                                                                                                                                                                                            |
| LPLPVQNPSETSEEEKR               | -                    | 0.90  | 45    | 1Dimeth_D2_N 1Dimeth_D2_K             | -         | -                                                                                                                                                                                                                                            |
| SYSGRLSPTR                      | S522                 | 0.90  | 28    | 1Phospho_ST 1Dimethyl_N               | 67.20     | 14.38 SpYSGRLSPTR b1y10 .54.78 SYSpGLRSPTR b3y8 .67.20 SYSGRLSPTR b7y4 .41.85 SYSGRLSPTR b6y2 .                                                                                                                                              |
| RTEVLTGLGPKPAAR                 | -                    | 0.92  | 56    | 1Dimeth_D2_N 1Dimeth_D2_K             | -         | -                                                                                                                                                                                                                                            |
| VESPPLEEWSPAPSFK                | -                    | 0.93  | 58    | 1Dimethyl_N 1Dimeth_K                 | -         | -                                                                                                                                                                                                                                            |
| VESPPLEEWSPAPSFK                | S481                 | 0.97  | 105   | 1Phospho_ST 1Dimethyl_N 1Dimeth_K     | 111.87    | 111.87 VESPPLEEWSPAPSFK b3y15 .18.74 VESPPLEEWSPAPSFK b11y7 .4.81 VESPPLEEWSPAPSFK b15y3 .                                                                                                                                                   |
| EESHSHWEDSSQSPTRPK              | -                    | 0.98  | 83    | 1Dimethyl_N 1Dimeth_K                 | -         | -                                                                                                                                                                                                                                            |
| RPLPVQNPSETSEEEKR               | -                    | 1.03  | 78    | 1Dimeth_D2_N 1Dimeth_D2_K             | -         | -                                                                                                                                                                                                                                            |
| HNLSLHDMFVR                     | -                    | 1.03  | 47    | 1Met(ox) 1Dimeth_D2_N                 | 83.81     | 83.81 HNLSLHDMoxFVR b6y4 .                                                                                                                                                                                                                   |
| HNLSLHDMFVR                     | -                    | 1.04  | 35    | 1Met(ox) 1Dimethyl_N                  | 71.15     | 71.15 HNLSLHDMoxFVR b6y4 .                                                                                                                                                                                                                   |
| VLLAEEIAPLSSAGPGK               | -                    | 1.07  | 149   | 1Dimethyl_N 1Dimeth_K                 | -         | -                                                                                                                                                                                                                                            |
| RTEVLTGLGPKPAAR                 | -                    | 1.08  | 31    | 1Dimeth_D2_N 1Dimeth_D2_K             | -         | -                                                                                                                                                                                                                                            |
| TPESWRLTPPAK                    | Te27                 | 1.09  | 35    | 1Phospho_ST 1Dimeth_D2_N 1Dimeth_D2_K | 77.31     | 33.80 TpPESWRLTPPAK b1y12 .67.31 TPESWRLTPPAK b4y9 .77.31 TPESWRLTPPAK b6y5 .                                                                                                                                                                |
| LPLPVQNPSETSEEEKR               | -                    | 1.10  | 40    | 1Dimethyl_N 1Dimeth_K                 | -         | -                                                                                                                                                                                                                                            |
| EESHSHWEDSSQSPTRPK              | -                    | 1.10  | 48    | 1Dimeth_D2_N 1Dimeth_D2_K             | -         | -                                                                                                                                                                                                                                            |
| TEVLTGLGPKPAAR                  | -                    | 1.10  | 76    | 1Dimethyl_N 1Dimeth_K                 | -         | -                                                                                                                                                                                                                                            |
| TEVLTGLGPKPAAR                  | -                    | 1.12  | 54    | 1Dimethyl_N 1Dimeth_K                 | -         | -                                                                                                                                                                                                                                            |
| VLLAEEIAPLSSAGPGK               | -                    | 1.25  | 48    | 1Dimethyl_N 1Dimeth_K                 | -         | -                                                                                                                                                                                                                                            |
| VSFWTHPSANR                     | -                    | 1.38  | 51    | 1Dimeth_D2_N                          | -         | -                                                                                                                                                                                                                                            |
| RTEVLTGLGPKPAAR                 | -                    | 1.39  | 58    | 1Dimethyl_N 1Dimeth_K                 | -         | -                                                                                                                                                                                                                                            |
| TPIKETLPISSIPSK                 | -                    | 1.44  | 56    | 1Dimethyl_N 2Dimeth_K                 | -         | -                                                                                                                                                                                                                                            |
| RPLPVQNPSETSEEEKR               | -                    | 1.53  | 45    | 1Dimeth_D2_N 1Dimeth_D2_K             | -         | -                                                                                                                                                                                                                                            |
| TPIKETLPISSIPSK                 | -                    | 1.59  | 52    | 1Dimethyl_N 2Dimeth_K                 | -         | -                                                                                                                                                                                                                                            |
| HNLSLHDMFVR                     | -                    | 1.78  | 49    | 1Dimeth_D2_N                          | -         | -                                                                                                                                                                                                                                            |
| VPLLAASLMSELR                   | -                    | 1.84  | 87    | 1Met(ox) 1Dimeth_D2_N                 | 82.62     | 82.62 VPLLAASLMoxSELR b10y7 .                                                                                                                                                                                                                |
| VLLAEEIAPLSSAGPGKEEK            | -                    | 1.88  | 143   | 1Dimethyl_N 2Dimeth_K                 | -         | -                                                                                                                                                                                                                                            |
| VLLAEEIAPLSSAGPGKEEK            | -                    | 1.96  | 82    | 1Dimeth_D2_N 2Dimeth_D2_K             | -         | -                                                                                                                                                                                                                                            |
| VLLAEEIAPLSSAGPGKEEK            | -                    | 2.01  | 30    | 1Dimeth_D2_N 2Dimeth_D2_K             | -         | -                                                                                                                                                                                                                                            |
| VPLLAASLMSELR                   | -                    | 2.03  | 102   | 1Dimeth_D2_N                          | -         | -                                                                                                                                                                                                                                            |
| VPLLAASLMSELR                   | -                    | 2.05  | 36    | 1Dimeth_D2_N                          | -         | -                                                                                                                                                                                                                                            |
| SLTEGLVLDLNDLSL                 | -                    | 2.06  | 112   | 1Met(ox) 1Dimeth_D2_N 1Dimeth_D2_K    | 128.58    | 128.58 SLTEGLVLDLNDLSL b11y7 .                                                                                                                                                                                                               |
| VPLLAASLMSELR                   | -                    | 2.19  | 55    | 1Met(ox) 1Dimeth_D2_N                 | 28.22     | 28.22 VPLLAASLMoxSELR b10y7 .                                                                                                                                                                                                                |
| OEMEEKENHLEQR                   | -                    | 2.40  | 35    | 1Met(ox) 1Dimeth_D2_N 1Dimeth_D2_K    | 69.17     | 69.17 OEMEEKENHLEQR b3y12 .                                                                                                                                                                                                                  |
| OEMEEKENHLEQR                   | -                    | 2.56  | 34    | 1Dimeth_D2_N 1Dimeth_D2_K             | -         | -                                                                                                                                                                                                                                            |
| OEMEEKENHLEQR                   | -                    | 2.65  | 30    | 1Dimethyl_N 1Dimeth_K                 | -         | -                                                                                                                                                                                                                                            |
| SLTEGLVLDLNDLSL                 | -                    | 2.65  | 133   | 1Dimeth_D2_N 1Dimeth_D2_K             | -         | -                                                                                                                                                                                                                                            |
| SLTEGLVLDLNDLSL                 | -                    | 3.75  | 62    | 1Dimeth_D2_N 1Dimeth_D2_K             | -         | -                                                                                                                                                                                                                                            |
| CVSEMLVIOHR                     | -                    | 3.91  | 53    | 1Met(ox) 1Dimeth_D2_N                 | 134.56    | 134.56 CVSEMLVIOHR b5y7 .                                                                                                                                                                                                                    |
| DVNLPRPPGALCEQK                 | -                    | 4.48  | 50    | 1Dimeth_D2_N 1Dimeth_D2_K             | -         | -                                                                                                                                                                                                                                            |
| DVNLPRPPGALCEQK                 | -                    | 4.60  | 48    | 1Dimeth_D2_N 1Dimeth_D2_K             | -         | -                                                                                                                                                                                                                                            |
| CVSEMLVIOHR                     | -                    | 5.38  | 86    | 1Dimeth_D2_N                          | -         | -                                                                                                                                                                                                                                            |
| CVSEMLVIOHR                     | -                    | 5.66  | 45    | 1Met(ox) 1Dimeth_D2_N                 | 119.71    | 119.71 CVSEMLVIOHR b5y7 .                                                                                                                                                                                                                    |
| SPAQQESNQAEASKEAESNCKFPAGIK     | -                    | 5.96  | 26    | 1Dimeth_D2_N 3Dimeth_D2_K             | -         | -                                                                                                                                                                                                                                            |
| CVSEMLVIOHR                     | -                    | 7.13  | 56    | 1Dimeth_D2_N                          | -         | -                                                                                                                                                                                                                                            |
| DVNLPRPPGALCEQK                 | -                    | 7.53  | 26    | 1Dimeth_D2_N 1Dimeth_D2_K             | -         | -                                                                                                                                                                                                                                            |
| EVAESNCKFPAGIK                  | -                    | 9.04  | 44    | 1Dimeth_D2_N 2Dimeth_D2_K             | -         | -                                                                                                                                                                                                                                            |
| FILSGGAPTQFPLRPTQTYSYDK         | -                    | 9.20  | 76    | 1Dimeth_D2_N 1Dimeth_D2_K             | -         | -                                                                                                                                                                                                                                            |
| DVNLPRPPGALCEQK                 | -                    | 9.70  | 31    | 1Dimethyl_N 1Dimeth_K                 | -         | -                                                                                                                                                                                                                                            |
| SPAQQESNQAEASKEAESNCK           | -                    | 13.97 | 87    | 1Dimethyl_N 2Dimeth_K                 | -         | -                                                                                                                                                                                                                                            |
| QHLLPPVDEPELLFEGPSTSR           | -                    | 14.92 | 75    | 1Dimeth_D2_N                          | -         | -                                                                                                                                                                                                                                            |
| RSPAQQESNQAEASKEAESNCK          | -                    | 16.65 | 65    | 1Dimeth_D2_N 2Dimeth_D2_K             | -         | -                                                                                                                                                                                                                                            |
